# Supplementary material for: Alanine-Serine-Cysteine Transporter 2 Inhibition Suppresses Prostate Cancer Cell Growth In Vitro
Source: MDPI journal article supplement (doi:10.3390/jcm11185466), 2022-09-16
Supplement: s1 [file s1]

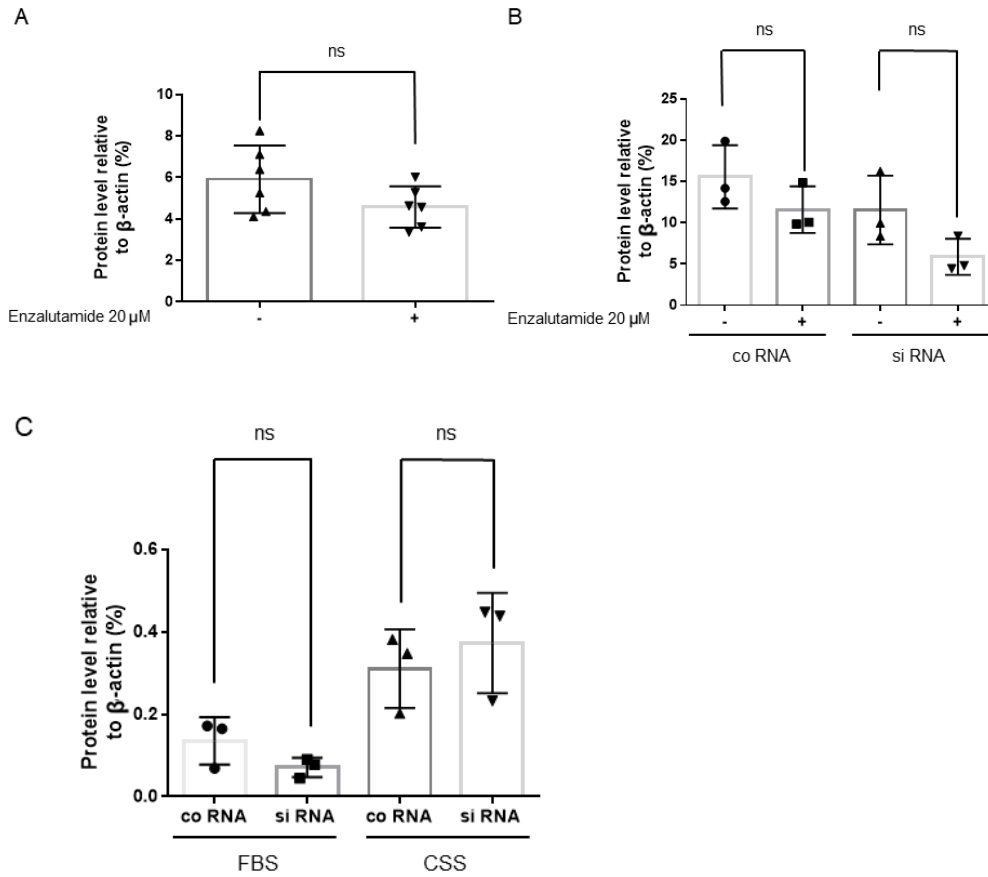

**Supplemental Figure S1. Western blot quantification.** (A) ASCT2 expression levels relative to  $\beta$ -actin were measured with or without enzalutamide 20  $\mu$ M in LNCaP cells. Histograms represent the mean  $\pm$  SD (NS: no significant difference). (B) ASCT2 expression levels relative to  $\beta$ -actin were measured with or without enzalutamide 20  $\mu$ M, after treatment with ASCT2 or negative control siRNA in LNCaP cells. Histograms represent the mean  $\pm$  SD (NS: no significant difference). (C) AR expression levels relative to  $\beta$ -actin were measured after treatment with ASCT2 or negative control siRNA in FBS or CSS media, in 22Rv1 cells. Histograms represent the mean  $\pm$  SD (NS: no significant difference).
